# Supplementary material
Source: PubMed Central journal article supplement (PMC5446901)
Supplement: NIHMS72044-supplement-Supplementary_notes_and_tables.pdf [file NIHMS72044-supplement-Supplementary_notes_and_tables.pdf]

## Supplementary Notes

### Note 1. Newly generated datasets, main reference genomes, and other previously published datasets used in this study

#### Note 1.1 Datasets generated in this study

##### The PacBio sequencing data for the 12 strains

Deposited location: EBI ENA database

Accession number: PRJEB7245

URL: <http://www.ebi.ac.uk/ena/data/view/PRJEB7245>

##### The Illumina sequencing data for the 12 strains

Deposited location: NCBI SRA database

Accession number: PRJNA340312

URL: <http://www.ncbi.nlm.nih.gov/bioproject/340312>

##### The final assemblies, annotations, extracted CDSs and protein sequences for the 12 strains

Deposited location: Our dedicated project website

URL: [https://yix1217.github.io/Yeast\\_PacBio\\_2016/data/](https://yix1217.github.io/Yeast_PacBio_2016/data/)

The assemblies were also deposited in Genbank under project PRJEB7245.

URL: <https://www.ncbi.nlm.nih.gov/bioproject/PRJEB7245/>

##### The re-annotation for *Saccharomyces arboricolus* H6

Deposited location: Our dedicated project website

URL: [https://yix1217.github.io/Yeast\\_PacBio\\_2016/data/](https://yix1217.github.io/Yeast_PacBio_2016/data/)

#### Note 1.2 Main reference genomes used in this study

##### *Saccharomyces cerevisiae* reference nuclear genome

Strain: S288C

Version: R64-1-1

URL: [http://downloads.yeastgenome.org/sequence/S288C\\_reference/genome\\_releases/](http://downloads.yeastgenome.org/sequence/S288C_reference/genome_releases/)

##### *Saccharomyces cerevisiae* reference mitochondrial genome

Strain: S288C

Version: R64-1-1

URL: [http://downloads.yeastgenome.org/sequence/S288C\\_reference/genome\\_releases/](http://downloads.yeastgenome.org/sequence/S288C_reference/genome_releases/)

##### *Saccharomyces paradoxus* reference nuclear genome

Strain: CBS432

Version: para2 (inside the misc.tgz file)

URL: <ftp://ftp.sanger.ac.uk/pub/users/dmc/yeast/latest/>

##### *Saccharomyces paradoxus* reference mitochondrial genome

Strain: CBS432  
Accession: NCBI Genbank JQ862335  
URL: <https://www.ncbi.nlm.nih.gov/nucleotide/JQ862335>

### **Note 1.3 Other previously published datasets used in this study**

#### **Study: Population genomics of domestic and wild yeasts (2009)**

Authors: Liti G, Carter DM, Moses AM, Warringer J, Parts L, James SA, Davey RP, Roberts IN, Burt A, Koufopanou V, Tsai IJ, Bergman CM, Bensasson D, O'Kelly MJT, van Oudenaarden A, Barton DBH, Bailes E, Nguyen AN, Jones M, Quail MA, Goodhead I, Sims S, Smith F, Blomberg A, Durbin R and Louis EJ

Reference: NCBI PubMed PMID: [19212322](https://pubmed.ncbi.nlm.nih.gov/19212322/)

URL: <ftp://ftp.sanger.ac.uk/pub/users/dmc/yeast/latest/>

#### **Study: The awesome power of yeast evolutionary genetics: New genome sequences and strain resources for the *Saccharomyces sensu stricto* genus (2011)**

Authors: Scannell DR, Zill OA, Rokas A, Payen C, Dunham MJ, Eisen MB, Rine J, Johnston M and Hittinger CT

Reference: NCBI PubMed PMID: [22384314](https://pubmed.ncbi.nlm.nih.gov/22384314/)

URL: <http://www.saccharomycessensustricto.org/cgi-bin/s3.cgi>

#### **Study: High quality *de novo* sequencing and assembly of the *Saccharomyces arboricolus* genome (2013)**

Authors: Liti G, Nguyen Ba AN, Blythe M, Müller CA, Bergström A, Cubillos FA, Dafnis-Calas F, Khoshraftar S, Malla S, Mehta N, Siow CC, Warringer J, Moses AM, Louis EJ and Nieduszynski CA

Reference: NCBI PubMed PMID: [23368932](https://pubmed.ncbi.nlm.nih.gov/23368932/)

URL: <http://www.moseslab.csb.utoronto.ca/sarb/>

#### **Study: A high-definition view of functional genetic variation from natural yeast genomes (2014)**

Authors: Bergström A, Simpson JT, Salinas F, Barré B, Parts L, Zia A, Nguyen Ba AN, Moses AM, Louis EJ, Mustonen V, Warringer J, Durbin R, and Gianni Liti G

Reference: NCBI PubMed PMID: [24425782](https://pubmed.ncbi.nlm.nih.gov/24425782/)

URL: <ftp://ftp.sanger.ac.uk/pub/users/dmc/yeast/SGRP2/input/strains/>

#### **Study: Long-read, whole-genome shotgun sequence data for five model organisms (2014)**

Authors: Kim KE, Peluso P, Babayan P, Yeadon PJ, Yu C, Fisher WW, Chin CS, Rapicavoli NA, Rank DR, Li J, Catcheside DE, Celniker SE, Phillippy AM, Bergman CM, and Landolin JM

Reference: NCBI PubMed PMID: [25977796](https://pubmed.ncbi.nlm.nih.gov/25977796/)

URL: [http://www.ncbi.nlm.nih.gov/assembly/GCA\\_000773925.1](http://www.ncbi.nlm.nih.gov/assembly/GCA_000773925.1)

**Study: Oxford Nanopore sequencing, hybrid error correction, and *de novo* assembly of a eukaryotic genome (2015)**

Authors: Goodwin S, Gurtowski J, Ethe-Sayers S, Deshpande P, Schatz MC and McCombie WR

Reference: NCBI PubMed PMID: [26447147](#)

URL: <http://schatzlab.cshl.edu/data/nanocorr/>

**Study: The genome sequence of *Saccharomyces eubayanus* and the domestication of Lager-brewing yeasts (2015)**

Authors: Baker E, Wang B, Bellora N, Peris D, Hulfachor AB, Koshalek JA, Adams M, Libkind D, and Hittinger CT

Reference: NCBI PubMed PMID: [26269586](#)

URL: <https://www.ncbi.nlm.nih.gov/bioproject/PRJNA243390/>

**Note 2. Detailed configuration for the Maker pipeline**

For repeatmasking, RepeatMasker (v4.0.5) (<http://www.repeatmasker.org/>) was used with the configuration options: “model\_org=fungi” and “softmask=1”. *Ab initio* gene prediction was performed by SNAP (release 2013-11-29)<sup>1</sup> and AUGUSTUS (v3.1.0)<sup>2</sup> with pre-trained gene prediction parameters. For SNAP, the pre-trained HMM parameter file was downloaded from GitHub ([https://github.com/hyphaltip/fungi-gene-prediction-params/blob/master/params/SNAP/saccharomyces\\_cerevisiae\\_S288C.hmm](https://github.com/hyphaltip/fungi-gene-prediction-params/blob/master/params/SNAP/saccharomyces_cerevisiae_S288C.hmm)).

For AUGUSTUS, we used the parameter file for *Saccharomyces* that shipped with AUGUSTUS. In complementary to *ab initio* gene prediction, the Maker pipeline also performs EST/protein alignment to further assess the automatically predicted gene models. For the EST data, we retrieved it from FungiDB ([http://fungidb.org/common/downloads/release-3.2/Scerevisiae\\_/fasta/](http://fungidb.org/common/downloads/release-3.2/Scerevisiae_/fasta/)).

For protein data, we combined the proteomes from several sources: the *S. cerevisiae* proteome from the *Saccharomyces* Genome Database (SGD) ([http://downloads.yeastgenome.org/sequence/S288C\\_reference/orf\\_protein/](http://downloads.yeastgenome.org/sequence/S288C_reference/orf_protein/)),

the protein sequences of characterized non-reference *S. cerevisiae* open reading frames (ORFs) documented in SGD, the protein sequences of non-reference *S. cerevisiae* ORFs identified in previous studies<sup>3-5</sup>, the proteomes of *S. paradoxus* (strain CBS432), *S. mikatae* (strain IFO1815), *S. kudriavzevii* (strain IFO1802), *S. kudriavzevii* (strain ZP591), and *S. bayanus var. uvarum* (strain CBS7001) based on Scannell et al.<sup>6</sup>, the proteome of *S. arboricolus* (strain H6) based on Liti et al.<sup>7</sup>, and the proteome of *S. eubayanus* (strain FM1318) based on Baker et al.<sup>8</sup>. These EST and protein sequences were aligned with the PacBio genome assemblies using blastn and blastx respectively (both from the NCBI-BLAST+ package (v2.2.30+)<sup>9</sup>) and further polished by exonerate (v2.2.0)<sup>10</sup>. Other custom settings that we used for the Maker pipeline include:

“min\_contig=10000, min\_protein=30, split\_hit=1500, single\_exon=1, single\_length=250 and correct\_est\_fusion=1”.

### **Note 3. Centromeres annotation**

*Saccharomyces* yeasts have point centromeres that encapsulate three Centromere DNA Elements (CDEI, CDEII and CDEIII). CDEI and CDEIII are evolutionary highly conserved whereas CDEII is much less conserved<sup>11</sup>. For *S. cerevisiae*, centromere annotation of the reference genome is available from SGD and the corresponding sequences were retrieved as the queries. For *S. paradoxus*, the query sequences were collected from three different studies<sup>11-13</sup>, which covered 15 centromeres. All these *S. cerevisiae* and *S. paradoxus* centromere queries were searched against our PacBio assemblies by Exonerate (v2.2.0)<sup>10</sup> for centromere annotation. The *S. paradoxus* chrVIII centromere has not been previously described, for which we ran the *de novo* annotation using a script (“CENannotate.pl”) provided by Dr. Bensasson<sup>11</sup> (can be retrieved from <https://github.com/bensassonlab/scripts>). All annotated centromeres were further verified based on their flanking genes, which are conserved across all the 12 strains. For each chromosome, the current chromosome identity was determined by the centromere that this chromosome encompasses.

### **Note 4. Annotation of the Ty retrotransposable elements**

Transposable elements (TEs) are prevalent in eukaryotic genomes and their roles in promoting structural genome evolution has been long appreciated. The *S. cerevisiae* genome harbors five classes of LTR retrotransposable elements: Ty1 to Ty5. Here, we employed RepeatMasker (v4.0.5) with a previously described custom library (containing *S. cerevisiae* Ty1-5 and *S. paradoxus* Ty3)<sup>14</sup> to systematically annotate Ty retrotransposable elements for all the 12 strains. The resulting output was further processed by REannotate<sup>15</sup> (v17.03.2015) (options: -g -k <clustalw> -f <fuzzy\_file> -d 10000 -t) for Ty defragmentation. Here, we treated the Ty1- and Ty2-LTR equivalently as suggested by previous study<sup>14</sup>. The identified full-length Ty1s and Ty2s were manually curated based on their internal sequences. To avoid false negative due to sequence divergence between the two species, we performed another round of search, in which the internal sequences and LTRs of the representative full-length *S. paradoxus* Tys annotated in the first round were further added into our custom Ty library for this round. All the truncated Tys and solo-LTRs were further curated based on the blastn search result against our Ty library (cutoffs:

identity >= 70%, aln\_length >= 100 bp).

### **Note 5. Annotation of the telomere associated core X-elements**

We retrieved core X-element sequences from the *S. cerevisiae* reference genome according to the SGD annotation and aligned them using MUSCLE (v3.8.31)<sup>16</sup>. Based on the alignment, we built an HMM profile (available at our dedicated project website: [https://yjx1217.github.io/Yeast\\_PacBio\\_2016/welcome/](https://yjx1217.github.io/Yeast_PacBio_2016/welcome/)) for the core X-element using the hmmbuild program (option: --dna) from the HMMER package (v3.1b2)<sup>17</sup>. This HMM profile was searched against our PacBio assemblies by nhmer (also from HMMER) (options: -E 1e-3 --tblout) to identify the core X-element.

### **Note 6. Annotation of the telomere associated Y'-elements**

We retrieved the Y'-element sequences of the *S. cerevisiae* reference genome based on the SGD annotation. There are two major classes of Y'-element for *S. cerevisiae*, the short version and the long version, differed by several large indels<sup>18</sup>. We selected a long Y'-element (at chrIX-L) as the representative query and performed the homology search using BLAT<sup>19</sup> (option: -maxIntron=1000) with subsequent filtering by psICDnaFilter (options: -minId=0.9 -minAlnSize=1000 -bestOverlap -filterWeirdOverlapped).

### **Note 7. The *CUP1* locus and copper tolerance**

The *CUP1* gene encodes a copper scavenging short metallothionein that keeps the intracellular level of free copper extremely low and thus mediates copper tolerance. Across our 12 strains, this gene was tandemly amplified into four, seven, and 11 copies in three *S. cerevisiae* strains (DBVPG6765, Y12 and S288C respectively) while maintaining the ancestral single copy configuration in all the other strains. The duplication segment in Y12 is different from that of DBVPG6765 and S288C, which likely reflects a scenario of convergent evolution driven by selection for copper tolerance in independently domesticated beverage producing lineages, as previously suggested<sup>20</sup>. Consistent with previous observations<sup>20</sup>, we found higher copy number of *CUP1* translates into faster growth (i.e. shorter generation time) in copper (CuCl<sub>2</sub>: 0.38 mM), although Y12 with seven copies appears to grow slightly faster than S288C with 11 copies (including one pseudogene copy).

## Note 8. The *ARR* cluster and arsenic tolerance

The *ARR* cluster contains three consecutive subtelomeric genes (*ARR1*, *ARR2* and *ARR3*) that function collectively to provide arsenic resistance. Despite their tricky genomic locations (only a few kb from the core-X element), we successfully characterized the exact genomic arrangement of the *ARR* cluster in all the 12 strains. Consistent with our previous estimates based on read mapping coverage<sup>4</sup>, the *ARR* cluster was duplicated in the European *S. paradoxus* CBS432 while completely lost in two *S. cerevisiae* (SK1 and UWOPS03-461.4) and two *S. paradoxus* (N44 and UWOPS91-917.1) strains. Our growth rate assay confirmed the link between *ARR* cluster loss and extreme susceptibility to arsenic (3 mM arsenite, As[III]). Despite having two copies of the *ARR* cluster with no strongly deleterious mutation in either gene/copy, CBS432 grew poorly in arsenic. The As[III] sensitivity of the South American *S. paradoxus* UFRJ50816 could potentially be explained by the pseudogenization of its *ARR2*, although it is only known to protect against pentavalent arsenic, As[V]<sup>21</sup>. The genes immediately proximal to the *ARR* cluster are located at the chr16-R subtelomere in all the 12 strains, implying that this subtelomere should be the ancestral location for the *ARR* cluster.

## References for Supplementary Notes

1. Korf, I. Gene finding in novel genomes. *BMC Bioinformatics* **5**, 59 (2004).
2. Stanke, M., Steinkamp, R., Waack, S. & Morgenstern, B. AUGUSTUS: A web server for gene finding in eukaryotes. *Nucleic Acids Res.* **32**, W309–W312 (2004).
3. Novo, M. *et al.* Eukaryote-to-eukaryote gene transfer events revealed by the genome sequence of the wine yeast *Saccharomyces cerevisiae* EC1118. *Proc. Natl. Acad. Sci.* **106**, 16333–16338 (2009).
4. Bergström, A. *et al.* A high-definition view of functional genetic variation from natural yeast genomes. *Mol. Biol. Evol.* **31**, 872–888 (2014).
5. Song, G. *et al.* AGAPE (Automated Genome Analysis Pipeline) for pan-genome analysis of *Saccharomyces cerevisiae*. *PLoS One* **10**, (2015).
6. Scannell, D. R. *et al.* The Awesome Power of Yeast Evolutionary Genetics: New Genome Sequences and Strain Resources for the *Saccharomyces sensu stricto* Genus. *G3 (Bethesda)*. **1**, 11–25 (2011).
7. Liti, G. *et al.* High quality de novo sequencing and assembly of the *Saccharomyces arboricolus* genome. *BMC Genomics* **14**, 69 (2013).
8. Baker, E. *et al.* The genome sequence of *Saccharomyces eubayanus* and the

- domestication of lager-brewing yeasts. *Mol. Biol. Evol.* **32**, 2818–2831 (2015).
9. Camacho, C. *et al.* BLAST+: architecture and applications. *BMC Bioinformatics* **10**, 421 (2009).
  10. Slater, G. S. C. & Birney, E. Automated generation of heuristics for biological sequence comparison. *BMC Bioinformatics* **6**, 31 (2005).
  11. Bensasson, D. Evidence for a high mutation rate at rapidly evolving yeast centromeres. *BMC Evol. Biol.* **11**, 211 (2011).
  12. Kellis, M., Patterson, N., Endrizzi, M., Birren, B. & Lander, E. S. Sequencing and comparison of yeast species to identify genes and regulatory elements. *Nature* **423**, 241–54 (2003).
  13. Liti, G. *et al.* Population genomics of domestic and wild yeasts. *Nature* **458**, 337–41 (2009).
  14. Carr, M., Bensasson, D. & Bergman, C. M. Evolutionary genomics of transposable elements in *Saccharomyces cerevisiae*. *PLoS One* **7**, e50978 (2012).
  15. Pereira, V. Automated paleontology of repetitive DNA with REANNOTATE. *BMC Genomics* **9**, 614 (2008).
  16. Edgar, R. C. MUSCLE: multiple sequence alignment with high accuracy and high throughput. *Nucleic Acids Res.* **32**, 1792–1797 (2004).
  17. Eddy, S. Profile hidden Markov models. *Bioinformatics* **14**, 755–763 (1998).
  18. Louis, E. J. & Haber, J. E. The structure and evolution of subtelomeric Y' repeats in *Saccharomyces cerevisiae*. *Genetics* **131**, 559–574 (1992).
  19. Kent, W. J. BLAT - The BLAST-like alignment tool. *Genome Res.* **12**, 656–664 (2002).
  20. Warringer, J. *et al.* Trait variation in yeast is defined by population history. *PLoS Genet.* **7**, e1002111 (2011).
  21. Mukhopadhyay, R., Shi, J. & Rosen, B. P. Purification and characterization of Acr2p, the *Saccharomyces cerevisiae* arsenate reductase. *J. Biol. Chem.* **275**, 21149–21157 (2000).

## Supplementary Tables

**Supplementary Table 1. Strain sampling for this study.**

| Species              | Strain        | Geographic origin | Source                      | Genetic modification                             | Liti lab internal collection ID | Note                                        |
|----------------------|---------------|-------------------|-----------------------------|--------------------------------------------------|---------------------------------|---------------------------------------------|
| <i>S. cerevisiae</i> | S288C         | USA               | Rotting fig                 | <i>Wild type</i>                                 | OS 96                           | Lab strain                                  |
| <i>S. cerevisiae</i> | DBVPG6044     | West Africa       | Bili wine                   | <i>Mat α, ura3::KanMX, lys2::URA3, ho::HygMX</i> | CC406                           |                                             |
| <i>S. cerevisiae</i> | DBVPG6765     | Europe            | Unknown                     | <i>Mat α, ura3::KanMX, lys2::URA3, ho::HygMX</i> | CC405                           |                                             |
| <i>S. cerevisiae</i> | SK1           | USA               | Soil                        | <i>Wild type</i>                                 | OS981                           | Lab strain                                  |
| <i>S. cerevisiae</i> | Y12           | Japan             | Sake                        | <i>Mat α, ura3::KanMX, lys2::URA3, ho::HygMX</i> | CC408                           |                                             |
| <i>S. cerevisiae</i> | YPS128        | USA               | <i>Quercus alba</i>         | <i>Mat α, ura3::KanMX, ho::HygMX</i>             | CC403                           |                                             |
| <i>S. cerevisiae</i> | UWOPS03-461.4 | Malaysia          | Betram palm                 | <i>Wild type</i>                                 | OS1005                          |                                             |
| <i>S. paradoxus</i>  | CBS432        | Russia            | <i>Quercus spp.</i>         | <i>Wild type</i>                                 | OS1045                          | Neotype strain of <i>S. paradoxus</i>       |
| <i>S. paradoxus</i>  | N44           | Russia            | <i>Quercus mongolica</i>    | <i>Wild type</i>                                 | OS1018                          |                                             |
| <i>S. paradoxus</i>  | YPS138        | USA               | <i>Quercus velutina</i>     | <i>Wild type</i>                                 | OS1022                          |                                             |
| <i>S. paradoxus</i>  | UFRJ50816     | Brazil            | <i>Drosophila spp.</i>      | <i>Wild type</i>                                 | OS1017                          | Previously regarded as <i>S. cariocanus</i> |
| <i>S. paradoxus</i>  | UWOPS91-917.1 | Hawaii            | <i>Myoporum sandwicense</i> | <i>Mat α, ho::KanMX</i>                          | CC293                           |                                             |



**Supplementary Table 2. PacBio and Illumina sequencing depth.**

| Strain        | PacBio sequencing depth | Illumina sequencing depth |
|---------------|-------------------------|---------------------------|
| S288C         | 96.88                   | 195.64                    |
| DBVPG6044     | 193.65                  | 208.09                    |
| DBVPG6765     | 109.63                  | 212.99                    |
| SK1           | 197.21                  | 193.71                    |
| Y12           | 217.32                  | 217.76                    |
| YPS128        | 112.39                  | 515.55                    |
| UWOPS03-461.4 | 301.16                  | 239.80                    |
| CBS432        | 111.61                  | 214.04                    |
| N44           | 124.78                  | 205.35                    |
| YPS138        | 117.42                  | 201.50                    |
| UFRJ50816     | 109.60                  | 187.20                    |
| UWOPS91-917.1 | 105.07                  | 314.91                    |

**Supplementary Table 3. Pilon correction for nuclear genome assemblies.**

| Strain        | Pilon change | SNP/Indel called before Pilon correction* | SNP/Indel called after Pilon correction* |
|---------------|--------------|-------------------------------------------|------------------------------------------|
| S288C         | 157          |                                           |                                          |
| DBVPG6044     | 1191         | 22/1092                                   | 6/50                                     |
| DBVPG6765     | 292          | 20/222                                    | 15/27                                    |
| SK1           | 569          | 19/510                                    | 11/47                                    |
| Y12           | 525          | 25/442                                    | 9/36                                     |
| YPS128        | 487          | 28/506                                    | 19/72                                    |
| UWOPS03-461.4 | 410          | 114/363                                   | 102/100                                  |
| CBS432        | 411          |                                           |                                          |
| N44           | 515          | 102/513                                   | 89/99                                    |
| YPS138        | 335          | 103/349                                   | 92/93                                    |
| UFRJ50816     | 133          |                                           |                                          |
| UWOPS91-917.1 | 99           |                                           |                                          |

Footnote:

\*: The SNP/Indel calling was based on independent Illumina sequencing data from what we used in Pilon correction. This independent data set was generated by Bergström et al. MBE (2014), which covered most strains sampled in our current study. The strain S288C, CBS432, and UWOPS91-917.3 were not sequenced. The strain UFRJ50816 was sequenced but the data quality is suboptimal.

**Supplementary Table 4. Pilon correction for mitochondrial genome assemblies.**

| Strain        | Pilon change | SNP/Indel called before Pilon correction* | SNP/Indel called after Pilon correction* |
|---------------|--------------|-------------------------------------------|------------------------------------------|
| S288C         | 13           |                                           |                                          |
| DBVPG6044     | 71           | 5/68                                      | 2/1                                      |
| DBVPG6765     | 11           | 3/7                                       | 0/0                                      |
| SK1           | 9            | 0/9                                       | 0/0                                      |
| Y12           | 14           | 2/12                                      | 0/0                                      |
| YPS128        | 12           | 0/12                                      | 0/2                                      |
| UWOPS03-461.4 | 46           | 4/46                                      | 2/2                                      |
| CBS432        | 6            |                                           |                                          |
| N44           | 5            | 0/5                                       | 0/0                                      |
| YPS138        | 8            | 0/9                                       | 0/1                                      |
| UFRJ50816     | 7            |                                           |                                          |
| UWOPS91-917.1 | 5            |                                           |                                          |

Footnote:

\*: The SNP/Indel calling was based on independent Illumina sequencing data from what we used in Pilon correction. This independent data was generated by Bergström et al. MBE (2014), which covered most strains sampled in our current study. The strain S288C, CBS432, and UWOPS91-917.3 were not sequenced. The strain UFRJ50816 was sequenced but the data quality is suboptimal.

**Supplementary Table 5. Total occurrences of different genomic features annotated in the nuclear genome.**

| Strain        | Centromere | Protein-coding gene* | tRNA | Ty-related** | Core X-element | Y'-element |
|---------------|------------|----------------------|------|--------------|----------------|------------|
| S288C         | 16         | 5,569                | 273  | 359          | 33             | 23         |
| DBVPG6044     | 16         | 5,543                | 275  | 440          | 33             | 21         |
| DBVPG6765     | 16         | 5,538                | 275  | 309          | 31             | 9          |
| SK1           | 16         | 5,542                | 275  | 408          | 32             | 31         |
| Y12           | 16         | 5,547                | 275  | 315          | 38             | 10         |
| YPS128        | 16         | 5,537                | 275  | 295          | 37             | 10         |
| UWOPS03-461.4 | 16         | 5,564                | 272  | 397          | 30             | 4          |
| CBS432        | 16         | 5,530                | 275  | 439          | 36             | 15         |
| N44           | 16         | 5,532                | 275  | 439          | 32             | 0          |
| YPS138        | 16         | 5,512                | 276  | 390          | 31             | 8          |
| UFRJ50816     | 16         | 5,522                | 275  | 553          | 29             | 9          |
| UWOPS91-917.1 | 16         | 5,520                | 270  | 518          | 23             | 7          |

Footnote:

\*: Pseudogenes are not included.

\*\* : Ty-related features include full-length Tys, truncated Tys and Ty solo-LTRs.

**Supplementary Table 6. Total occurrences of Ty-related features annotated in the nuclear genome.**

| Strain        | Full-length Ty |     |     |     |     | Truncated Ty |     |     |     |     | Ty solo-LTR  |     |     |     |
|---------------|----------------|-----|-----|-----|-----|--------------|-----|-----|-----|-----|--------------|-----|-----|-----|
|               | Ty1            | Ty2 | Ty3 | Ty4 | Ty5 | Ty1          | Ty2 | Ty3 | Ty4 | Ty5 | Ty1/<br>Ty2* | Ty3 | Ty4 | Ty5 |
| S288C         | 40             | 13  | 2   | 3   | 1   | 2            | 0   | 0   | 0   | 0   | 224          | 37  | 30  | 7   |
| DBVPG6044     | 20             | 1   | 1   | 0   | 0   | 5            | 0   | 0   | 0   | 0   | 315          | 42  | 36  | 20  |
| DBVPG6765     | 0              | 15  | 0   | 0   | 1   | 2            | 2   | 0   | 0   | 0   | 214          | 48  | 21  | 6   |
| SK1           | 19             | 5   | 1   | 0   | 1   | 6            | 0   | 0   | 0   | 0   | 291          | 37  | 29  | 19  |
| Y12           | 19             | 2   | 2   | 5   | 2   | 3            | 0   | 0   | 0   | 0   | 216          | 31  | 29  | 6   |
| YPS128        | 2              | 11  | 7   | 4   | 0   | 3            | 0   | 0   | 0   | 0   | 205          | 22  | 27  | 14  |
| UWOPS03-461.4 | 0              | 0   | 0   | 0   | 0   | 5            | 1   | 0   | 0   | 0   | 250          | 47  | 76  | 18  |
| CBS432        | 9              | 0   | 2   | 0   | 7   | 6            | 0   | 0   | 2   | 2   | 281          | 60  | 50  | 20  |
| N44           | 2              | 0   | 5   | 4   | 0   | 5            | 0   | 0   | 2   | 0   | 235          | 70  | 103 | 13  |
| YPS138        | 0              | 0   | 0   | 1   | 0   | 3            | 0   | 0   | 0   | 0   | 240          | 42  | 73  | 31  |
| UFRJ50816     | 22             | 0   | 0   | 23  | 0   | 4            | 0   | 0   | 2   | 0   | 312          | 38  | 125 | 27  |
| UWOPS91-917.1 | 9              | 0   | 0   | 1   | 0   | 1            | 0   | 0   | 1   | 5   | 357          | 24  | 100 | 20  |

Footnote:

\* The solo-LTR of Ty1 and Ty2 are highly similar with frequent recombination, therefore we treated them together without further differentiation.

**Supplementary Table 7. Total occurrences of different genomic features annotated in the mitochondrial genome.**

| Strain        | Protein-coding gene | tRNA | rRNA | <i>rnpB</i> |
|---------------|---------------------|------|------|-------------|
| S288C         | 8                   | 27   | 2    | 1           |
| DBVPG6044     | 8                   | 27   | 2    | 1           |
| DBVPG6765     | 8                   | 28   | 2    | 1           |
| SK1           | 8                   | 27   | 2    | 1           |
| Y12           | 8                   | 25   | 2    | 1           |
| YPS128        | 8                   | 27   | 2    | 1           |
| UWOPS03-461.4 | 8                   | 26   | 2    | 1           |
| CBS432        | 8                   | 24   | 2    | 1           |
| N44           | 8                   | 25   | 2    | 1           |
| YPS138        | 8                   | 24   | 2    | 1           |
| UFRJ50816     | 8                   | 24   | 2    | 1           |
| UWOPS91-917.1 | 8                   | 24   | 2    | 1           |

**Supplementary Table 8. Cumulative lengths of annotated features in the nuclear genome.**

| Strain        | Total length* (bp) | Centromere (bp) | CDS** (bp) | tRNA (bp) | Ty-related*** (bp) | Core X-element (bp) | Y'-element (bp) |
|---------------|--------------------|-----------------|------------|-----------|--------------------|---------------------|-----------------|
| S288C         | 12,157,149         | 1,891           | 8,321,070  | 21,795    | 425,100            | 14,316              | 129,664         |
| DBVPG6044     | 11,958,041         | 1,892           | 8,327,484  | 21,941    | 240,470            | 12,666              | 89,478          |
| DBVPG6765     | 11,813,188         | 1,895           | 8,305,296  | 21,941    | 173,995            | 13,068              | 48,304          |
| SK1           | 12,063,285         | 1,891           | 8,335,593  | 21,941    | 254,537            | 13,008              | 147,944         |
| Y12           | 11,881,147         | 1,896           | 8,317,002  | 21,941    | 245,945            | 15,298              | 55,199          |
| YPS128        | 11,910,474         | 1,893           | 8,351,790  | 21,940    | 209,294            | 15,234              | 66,055          |
| UWOPS03-461.4 | 11,747,346         | 1,890           | 8,341,971  | 21,673    | 114,234            | 12,284              | 21,892          |
| CBS432        | 12,021,328         | 1,895           | 8,357,142  | 21,955    | 222,044            | 14,845              | 86,862          |
| N44           | 11,811,689         | 1,900           | 8,349,201  | 21,950    | 186,199            | 13,475              | 0               |
| YPS138        | 11,811,722         | 1,889           | 8,329,080  | 22,023    | 107,930            | 13,749              | 57,494          |
| UFRJ50816     | 12,137,283         | 1,894           | 8,323,545  | 21,950    | 390,671            | 12,755              | 61,568          |
| UWOPS91-917.1 | 11,856,618         | 1,890           | 8,242,776  | 21,570    | 189,009            | 9,700               | 50,470          |

Footnote:

\*: This total assembly length includes a 17,357 bp rDNA gap.

\*\*: The CDSs from pseudogenes are not included.

\*\*\*: Ty-related features include full-length Tys, truncated Tys and Ty solo-LTRs.

**Supplementary Table 9. Cumulative lengths of annotated features in the mitochondrial genome.**

| Strain        | Total length (bp) | CDS (bp) | tRNA (bp) | <i>rnpB</i> (bp) | <i>rns</i> (bp) | <i>rnl</i> (bp) | <i>COX1</i> introns (bp) | <i>COB</i> introns (bp) |
|---------------|-------------------|----------|-----------|------------------|-----------------|-----------------|--------------------------|-------------------------|
| S288C         | 85,793            | 6,684    | 2,041     | 448              | 1,649           | 4,439           | 11,278                   | 5,951                   |
| DBVPG6044     | 81,093            | 6,648    | 2,042     | 359              | 1,650           | 3,287           | 6,322                    | 5,745                   |
| DBVPG6765     | 81,722            | 6,651    | 2,118     | 458              | 1,645           | 3,303           | 5,905                    | 6,197                   |
| SK1           | 84,638            | 6,648    | 2,042     | 359              | 1,650           | 4,425           | 8,867                    | 5,475                   |
| Y12           | 82,868            | 6,660    | 1,855     | 382              | 1,646           | 3,288           | 10,085                   | 3,748                   |
| YPS128        | 77,479            | 6,651    | 2,032     | 342              | 1,648           | 3,286           | 6,354                    | 5,978                   |
| UWOPS03-461.4 | 74,179            | 6,654    | 1,940     | 393              | 1,646           | 3,202           | 5,037                    | 3,752                   |
| CBS432        | 71,482            | 6,603    | 1,785     | 301              | 1,616           | 3,462           | 5,635                    | 5,125                   |
| N44           | 69,948            | 6,612    | 1,865     | 296              | 1,614           | 3,531           | 5,685                    | 7,398                   |
| YPS138        | 71,396            | 6,651    | 1,786     | 367              | 1,608           | 3,583           | 3,937                    | 3,190                   |
| UFRJ50816     | 77,386            | 6,660    | 1,786     | 376              | 1,617           | 3,650           | 4,638                    | 4,626                   |
| UWOPS91-917.1 | 73,171            | 6,660    | 1,786     | 318              | 1,625           | 3,634           | 4,549                    | 3,190                   |



**Supplementary Table 10. Distribution of group I and group II introns in the mitochondrial genome.**

(See separate file)

**Supplementary Table 11. The chromosomal core boundaries defined based on synteny conservation across the 12 strains.**

| Chromosome* | Left boundary gene | Right boundary gene |
|-------------|--------------------|---------------------|
| chr01       | YAL062W            | YAR042W             |
| chr02       | YBL107C            | YBR297W             |
| chr03       | YCL067C            | YCR095C             |
| chr04       | YDL240W            | YDR541C             |
| chr05       | YEL066W            | YER185W             |
| chr06       | YFL050C            | YFR055W             |
| chr07       | YGL258W            | YGR287C             |
| chr08       | YHL040C            | YHR210C             |
| chr09       | YIL166C            | YIR038C             |
| chr10       | YJL213W            | YJR154W             |
| chr11       | YKL222C            | YKR101W             |
| chr12       | YLL060C            | YLR460C             |
| chr13       | YML131W            | YMR319C             |
| chr14       | YNL330C            | YNR071C             |
| chr15       | YOL154W            | YOR387C             |
| chr16       | YPL272C            | YPR193C             |

Footnote:

\* The chromosome number listed here represents the ancestral chromosome identity, which takes into account the large-scale interchromosomal rearrangements in UWOPS03-461.4, UFRJ50816 and UWOPS91-917.1.

**Supplementary Table 12. Subtelomeres involved in large-scale chromosomal rearrangements based on their ancestral locations.**

| Strain        | Current location | Ancestral location* |
|---------------|------------------|---------------------|
| UWOPS03-461.4 | chrVII-L         | chr10-L             |
|               | chrVII-R         | chr08-R             |
|               | chrVIII-R        | chr07-R             |
|               | chrX-L           | chr13-R             |
|               | chrXI-R          | chr07-L             |
|               | chrXIII-R        | chr11-R             |
| UFRJ50816     | chrII-R          | chr16-R             |
|               | chrIV-L          | chr11-L             |
|               | chrIX-L          | chr15-L             |
|               | chrXI-L          | chr04-L             |
|               | chrXII-L         | chr14-L             |
|               | chrXIII-L        | chr14-R             |
|               | chrXIV-L         | chr12-L             |
|               | chrXIV-R         | chr13-L             |
|               | chrXV-L          | chr09-L             |
|               | chrXVI-R         | chr02-R             |
|               | UWOPS91-917.1    | chrV-R              |
| chrXIII-R     |                  | chr05-R             |

Footnote:

\*: The ancestral location of the subtelomere was determined based on the gene content of its flanking chromosomal core.

**Supplementary Table 13. Chromosome-end structure characterized for the 12 strains.**

(See separate file)

**Supplementary Table 14. Enriched Gene Ontology (GO) terms of genes involved in unbalanced rearrangements.**

| GO ID      | GO Term                                                     | Category | FDR      | P-value  |
|------------|-------------------------------------------------------------|----------|----------|----------|
| GO:0008554 | Sodium-exporting ATPase activity, phosphorylative mechanism | F        | 1.01E-03 | 2.73E-07 |
| GO:0008556 | Potassium-transporting ATPase activity                      | F        | 1.01E-03 | 2.73E-07 |
| GO:0035725 | Sodium ion transmembrane transport                          | P        | 2.68E-03 | 1.09E-06 |
| GO:0006813 | Potassium ion transport                                     | P        | 2.16E-02 | 4.34E-05 |
| GO:0046870 | Cadmium ion binding                                         | F        | 2.16E-02 | 4.37E-05 |
| GO:0010273 | Detoxification of copper ion                                | P        | 2.16E-02 | 4.37E-05 |
| GO:0071585 | Detoxification of cadmium ion                               | P        | 2.16E-02 | 4.37E-05 |

Footnote:

1. For the category column, "C" stands for cellular component, "F" for biological function, and "P" biological process. The statistical significance was assessed by Fisher's exact test with FDR correction.
2. For the FDR column, FDR stands for false discovery rate.

**Supplementary Table 15. Pairs of subtelomeric duplication blocks within each strain.**

| Strain        | Total | Found in both species | Species-specific* | Strain-specific |
|---------------|-------|-----------------------|-------------------|-----------------|
| S288C         | 12    | 10                    | 2                 | 0               |
| DBVPG6044     | 11    | 5                     | 6                 | 2               |
| DBVPG6765     | 11    | 5                     | 6                 | 4               |
| SK1           | 8     | 4                     | 4                 | 2               |
| Y12           | 14    | 10                    | 4                 | 2               |
| YPS128        | 10    | 8                     | 2                 | 0               |
| UWOPS03-416.4 | 17    | 11                    | 6                 | 2               |
| CBS432        | 21    | 9                     | 12                | 9               |
| N44           | 13    | 7                     | 6                 | 4               |
| YPS138        | 14    | 8                     | 6                 | 3               |
| UFRJ50816     | 16    | 10                    | 6                 | 3               |
| UWOPS91-917.1 | 26    | 10                    | 16                | 13              |
| All strains   | 173   | 97                    | 76                | 44              |

Footnote:

\*: The species-specific cases here include those cases that are strain-specific.

**Supplementary Data Set 1. One-to-one nuclear orthologous gene groups across the 12 strains and the six outgroups.**

(See separate file)

**Supplementary Data Set 2. Genomic coordinates for subtelomeres identified in the 12 strains.**

(See separate file)



**Supplementary Data Set 3. Genomic features enclosed in subtelomeres and chromosome-ends.**

(See separate file)

**Supplementary Data Set 4. Balanced rearrangement events identified in the 12 strains.**

(See separate file)

**Supplementary Data Set 5. Unbalanced rearrangement events identified in the  
12 strains.**

(See separate file)

**Supplementary Data Set 6. Subtelomeric duplication blocks identified in the 12 strains.**

(See separate file)

**Supplementary Data Set 7. Strain-sharing patterns of duplicated subtelomere pairs.**

(See separate file)
